# Supplementary material
Source: Springer Nature journal article supplement (https://www.springerprofessional.de/resource/supplementary/13638_2012_556_MOESM10_ESM.pdf/11897948)

Conversational

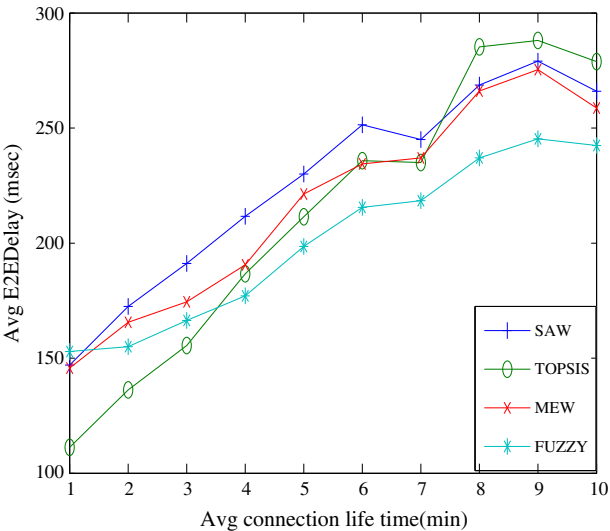

(a)

Streaming

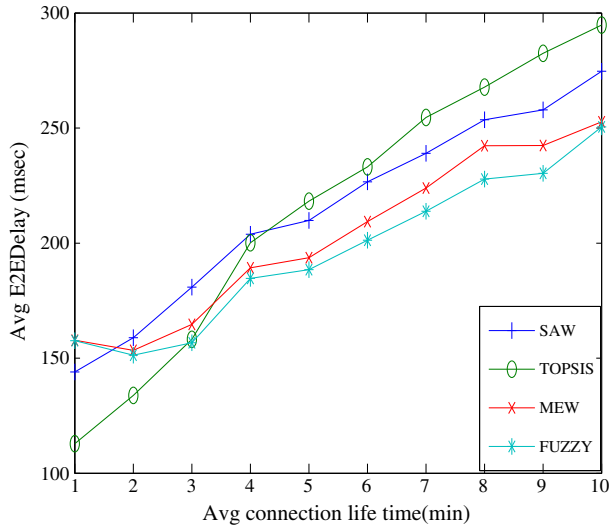

(b)

Interactive

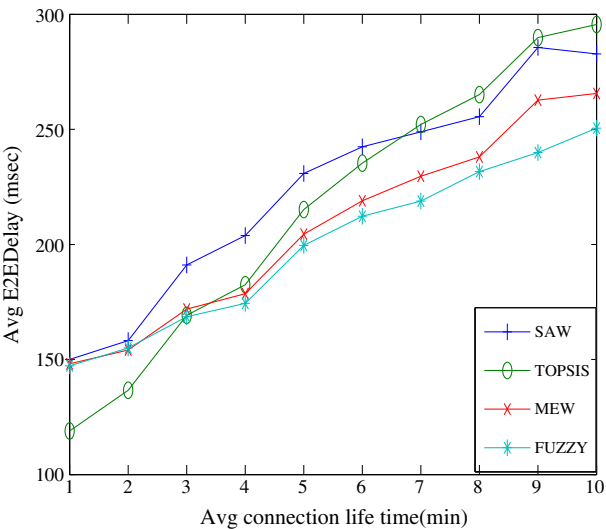

(c)

Background

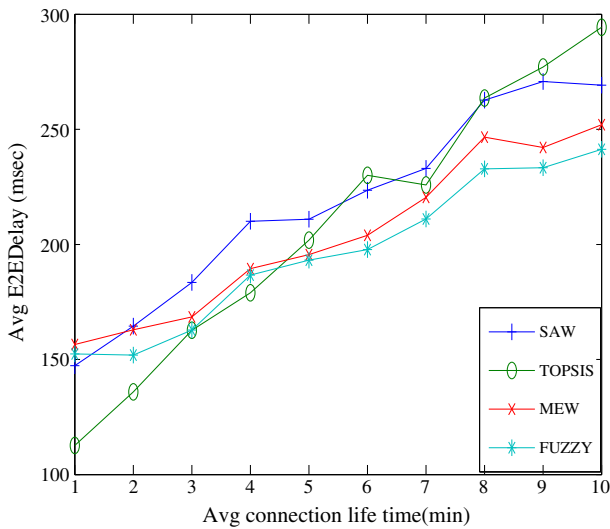

(d)

Supplement: MOESM10 [file 11897948]
